# Supplementary material
Source: publisher site journal article supplement (https://www.dovepress.com/article/469445)
Supplement: Supplementary file 1 [file get_supplementary_file.php]

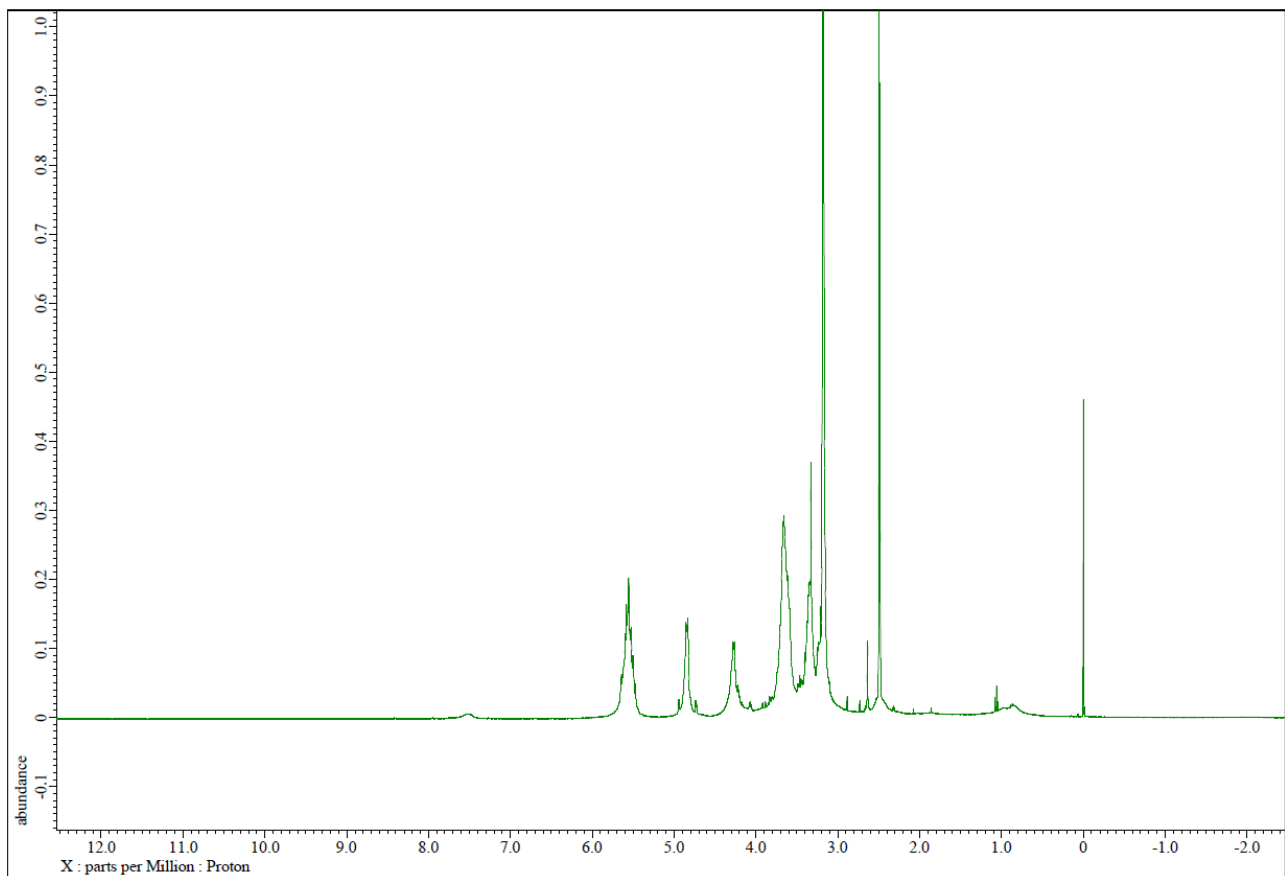

**Figure S1:** <sup>1</sup>H NMR spectrum of CDQA. <sup>1</sup>H NMR(400 MHz, DMSO-d<sub>6</sub>) :  $\delta$  = 0.6-1.5 (C-CH<sub>3</sub>), 1.5-2.2 (CH<sub>2</sub>-C-CH<sub>3</sub>), 2.3-2.8 (C(=O)-(CH<sub>2</sub>)<sub>2</sub>-C(=O)-), 3.0-3.3 (N-(CH<sub>3</sub>)<sub>3</sub>), 3.3-4.0 (H of C2 to C6, N-CH<sub>2</sub>, CH<sub>2</sub>-CH(OH)-CH<sub>2</sub>), 4.1-4.5 (-O-(CH<sub>2</sub>)<sub>2</sub>-O-, OH of C6, O-CH<sub>2</sub>-CH(OH)), 4.6-5.1 (H of C1), 5.7-6.3 (OH of C2 and C3), 7.4-7.7 (NH)

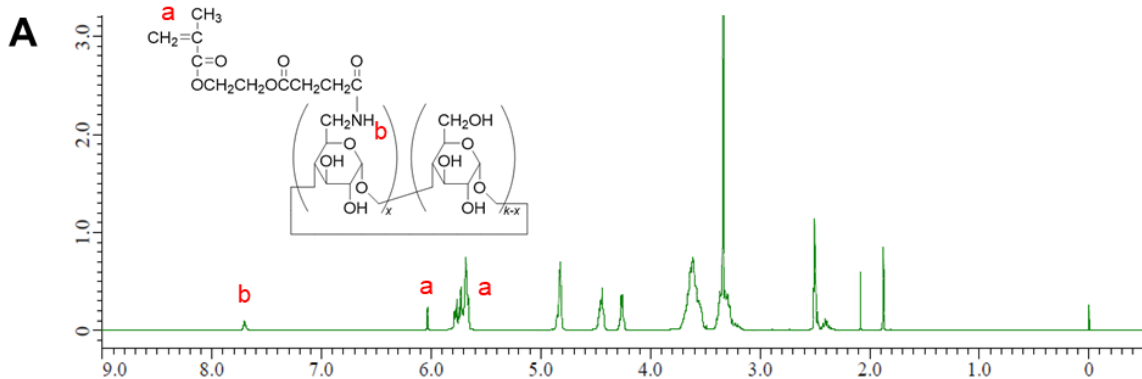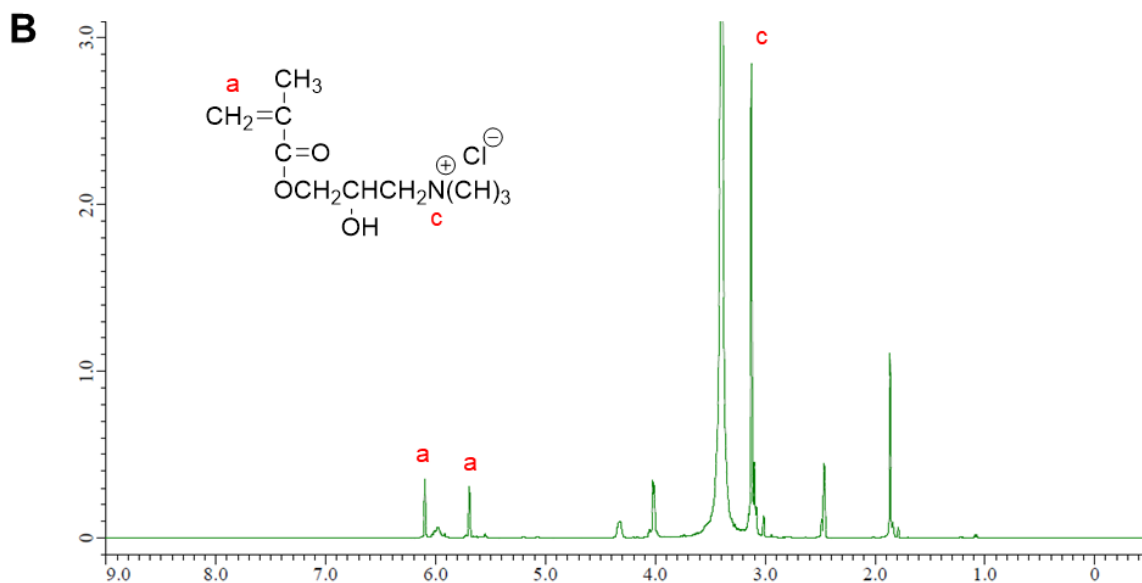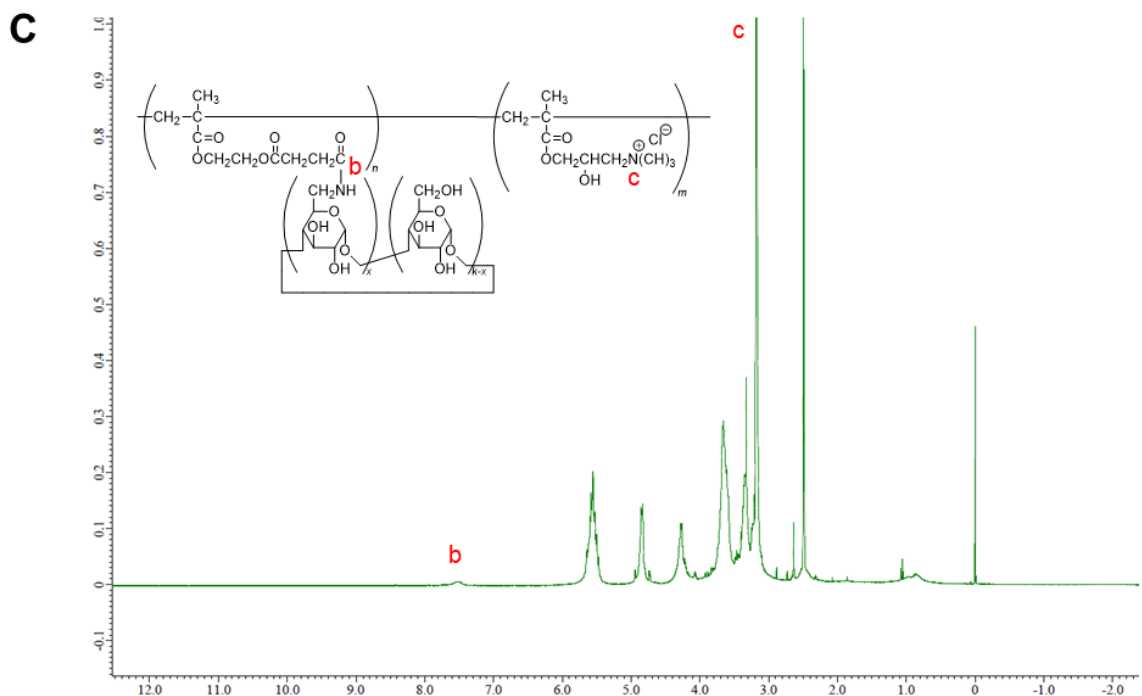

**Figure S2:** Structural formula and  $^1\text{H}$  NMR spectrum of CD-MSAm (A), QA (B), and CDQA (C).
